# Supplementary material for: The molecular organization of differentially curved caveolae indicates bendable structural units at the plasma membrane
Source: Springer Nature journal article supplement (doi:10.1038/s41467-022-34958-3), 2022-11-24
Supplement: MOESM1 [file 41467_2022_34958_MOESM1_ESM.pdf]

## Supplementary Information

**The molecular organization of differentially curved caveolae indicates bendable structural units at the plasma membrane.**

Claudia Matthaeus<sup>1</sup>, Kem A. Sochacki<sup>1</sup>, Andrea Dickey<sup>1</sup>, Dmytro Puchkov<sup>2</sup>, Volker Haucke<sup>2,3</sup>, Martin Lehmann<sup>2</sup>, Justin W. Taraska<sup>1\*</sup>

<sup>1</sup> Biochemistry and Biophysics Center, National Heart, Lung, and Blood Institute, National Institutes of Health, Bethesda, MD, USA \*justin.taraska@nih.gov

<sup>2</sup> Leibniz-Forschungsinstitut für Molekulare Pharmakologie (FMP), Berlin, Germany

<sup>3</sup> Faculty of Biology, Chemistry and Pharmacy, Freie Universität Berlin, Berlin, Germany

\*Correspondence should be addressed to Justin W. Taraska (justin.taraska@nih.gov)

**Suppl. Figure 1: Representative PREM images of caveolae rosettes in various cell types.**

**Suppl. Figure 2: Analysis of the caveolar coat stripes in PREM images.**

**Suppl. Figure 3: Caveolae can be classified in low, medium and highly curved invagination types.**

**Suppl. Figure 4: Exact caveolae size measurement by STED microscopy.**

**Suppl. Figure 5: STED-CLEM overview of plasma membrane sheets showing clathrin and cavin1.**

**Suppl. Figure 6: Immature caveolae sites can be detected by STED-CLEM.**

**Suppl. Figure 7: Cavin localization at low curved caveolae after mild osmotic shock in HUVEC.**

**Suppl. Figure 8: Representative overview STED-CLEM images of endogenously stained cavin2 or 3 in HUVEC plasma membrane sheets treated with strong osmotic shock**

**Suppl. Figure 9: Cavin1, 2 and 3 localization to Caveolin1 in intact HUVEC after osmotic shock.**

**Suppl. Figure 10: Endogenous staining of Pacsin2 and EHBP1 at caveolae.**

**Suppl. Figure 11: Western Blot validation of pacsin2 and EHBP1 knockdown.**

**Suppl. Figure 12: Immunostaining of endogenous dynamin in MEFs did not show localization to caveolae.**

**Suppl. Figure 13: STORM-CLEM in HeLa and SK-MEL-2 cells did not show dynamin localization to caveolae.**

**Suppl. Figure 14: Western Blot validation of dynamin triple knockout**

**Suppl. Video1:** Electron tomogram of MEF plasma membrane sheet including caveolae.

**Suppl. Video2:** Electron tomogram of low curved caveolae.

**Suppl. Video3:** Electron tomogram of medium curved caveolae.

**Suppl. Video4:** Electron tomogram of highly curved caveolae.

Source data are provided in Source Data file.

HeLa

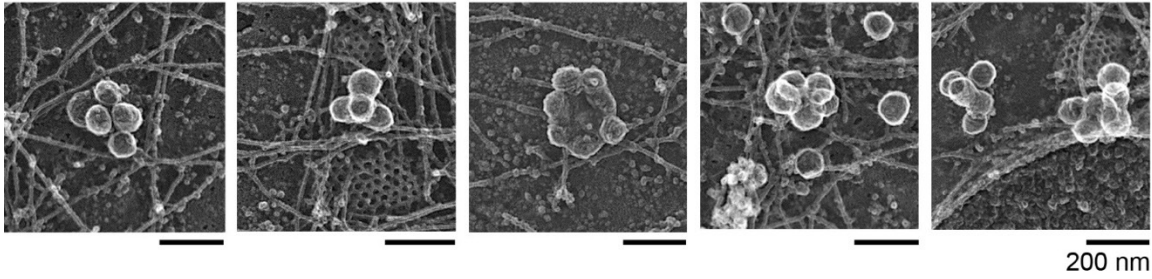

Adipocytes

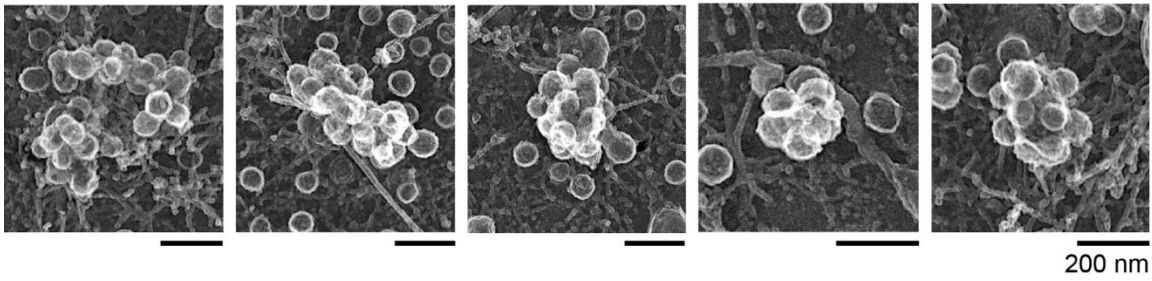

Myoblasts

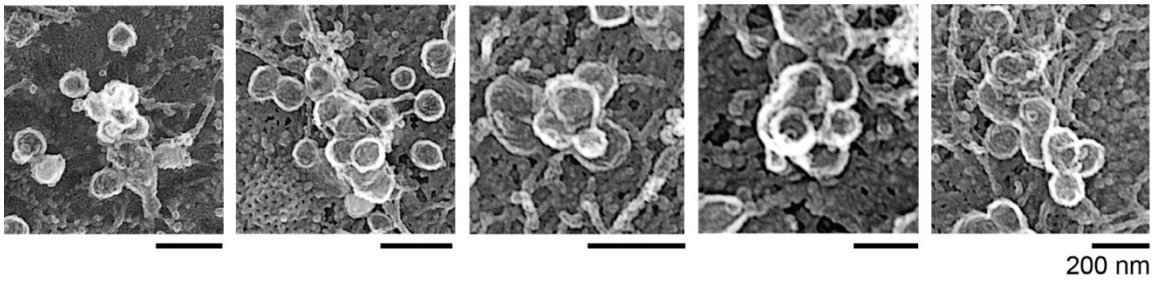

Mouse Embryonic Fibroblasts

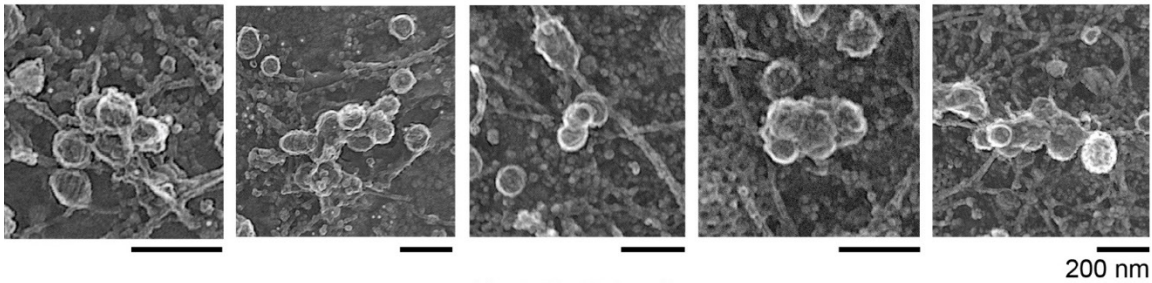

Endothelial cells

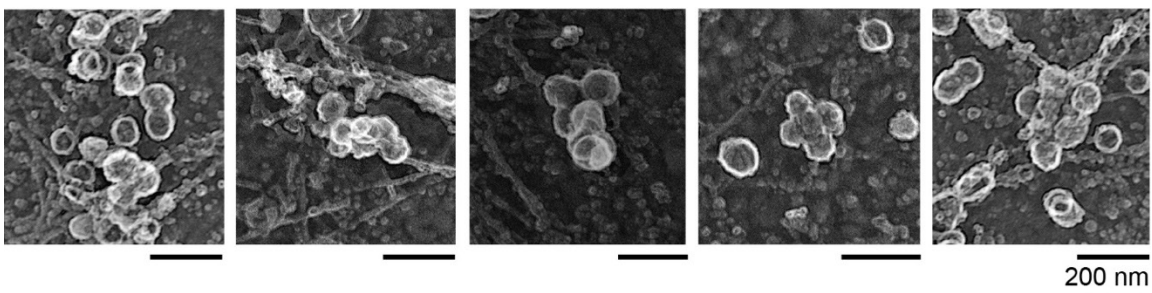

**Suppl. Figure 1: Representative PREM images of caveolae rosettes in various cell types.** (3 independent experiments)

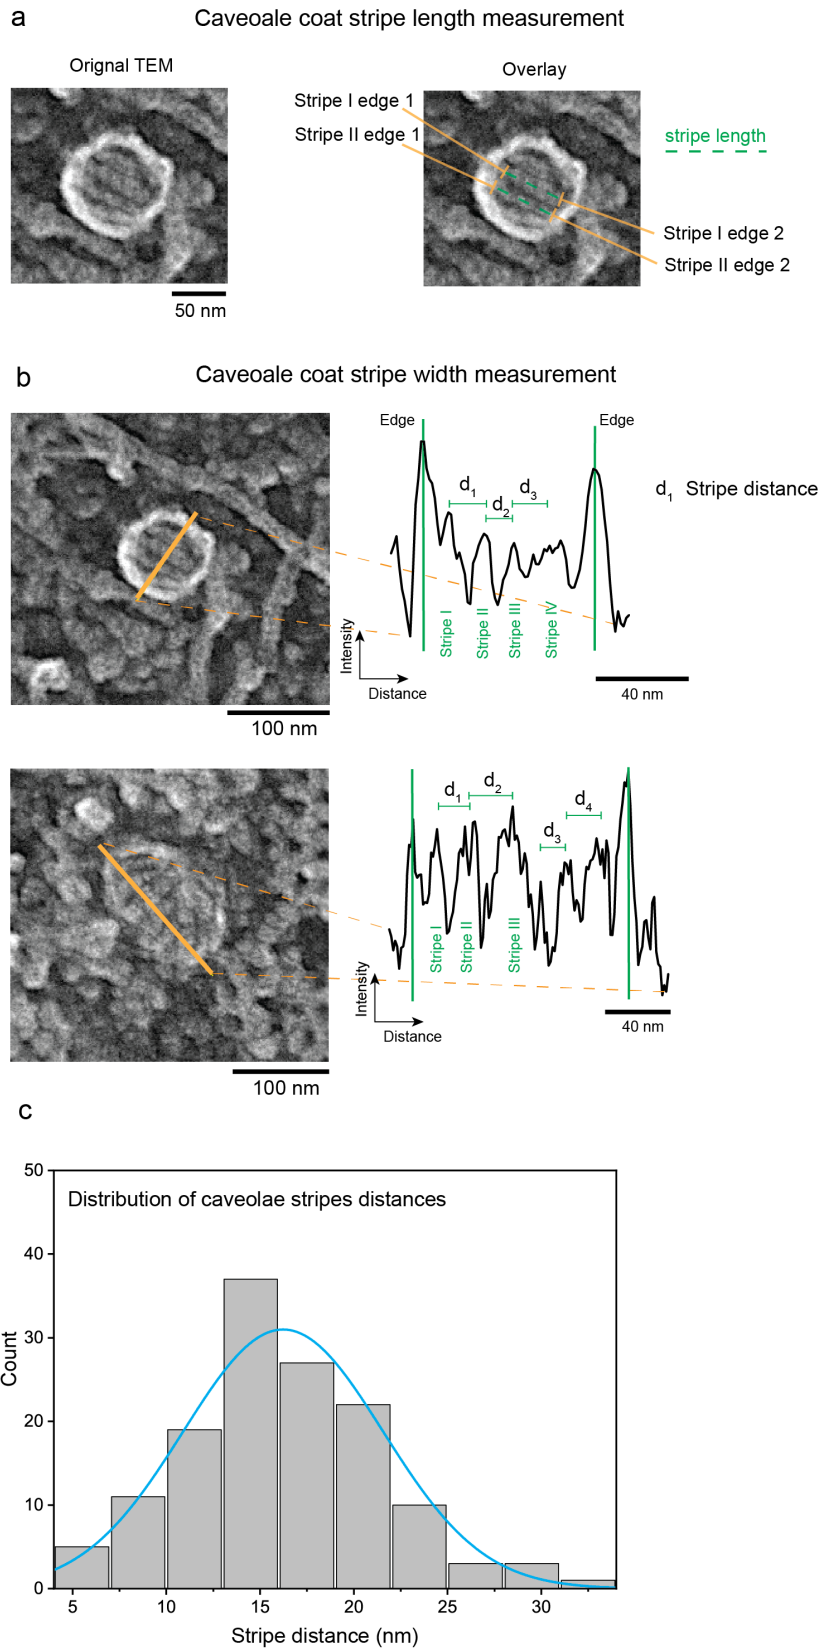

**Suppl. Figure 2: Analysis of the caveolar coat stripes in PREM images.**

- (a) The length of the caveolar coat stripe was measured by ImageJ in which the distance (in nm) from one stripe edge to the other edge was measured (as indicated in the left overlay TEM image).
- (b) Caveolae stripe width was estimated by measuring the distance between neighboring stripes in intensity plots of stripes within a caveolar domain. Maxima in the intensity plot illustrate stripes and minima the dark edge between neighboring stripes.
- (c) Distribution of caveolae stripe distances measured in PREM of MEFs (n =138/5 cells, mean = 16.2 nm  $\pm$  0.5 nm; 3 independent experiments).

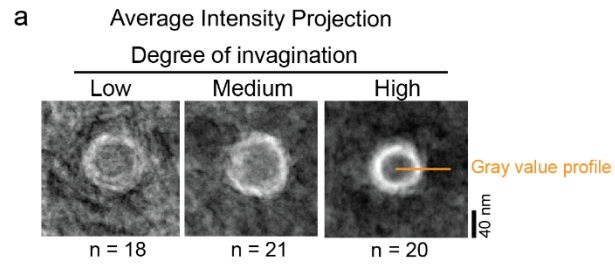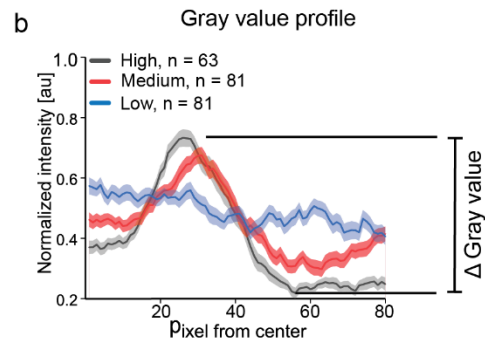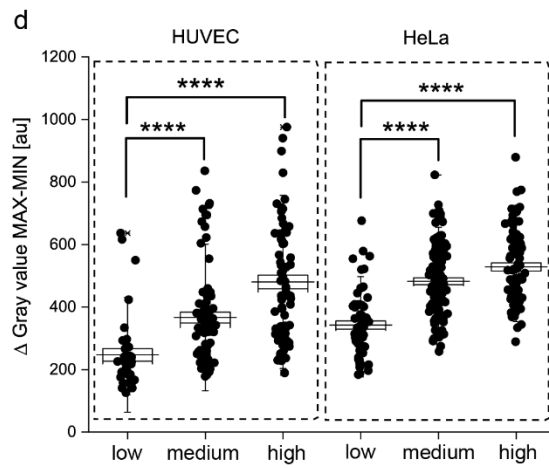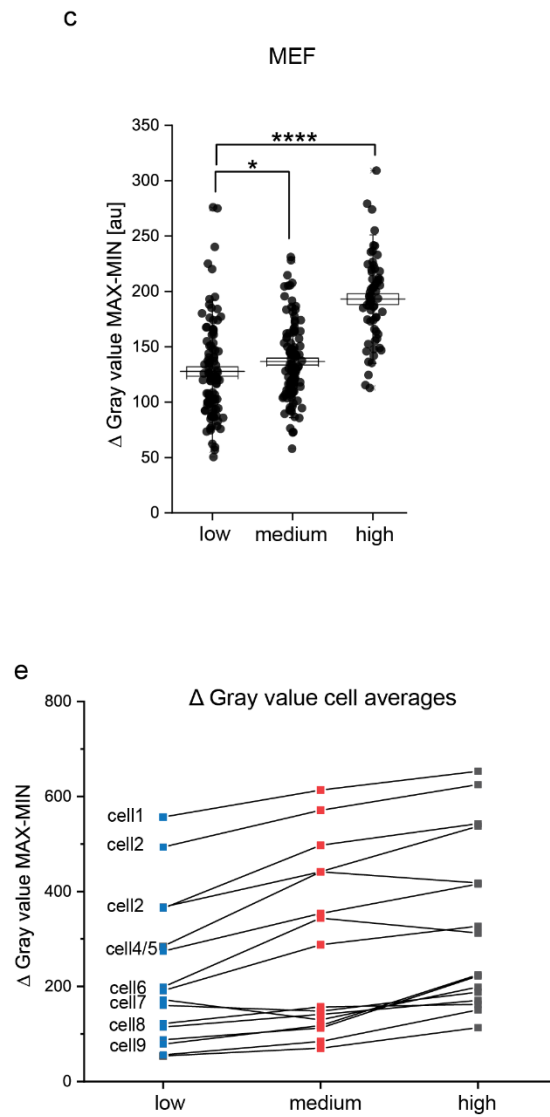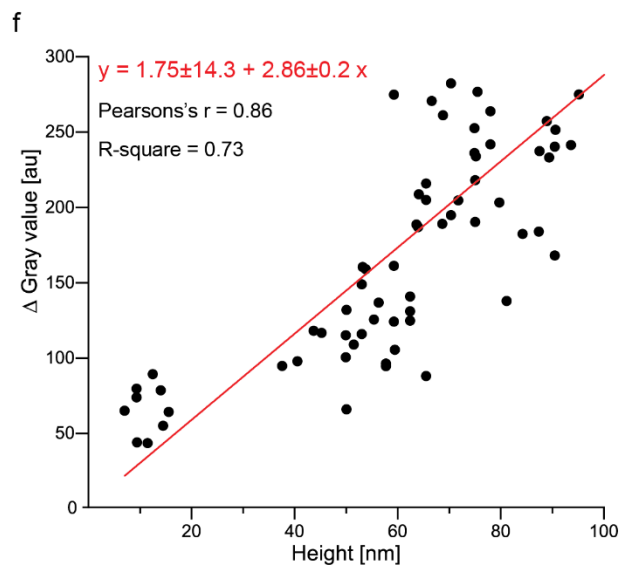

**Suppl. Figure 3: Caveolae can be classified in low, medium and highly curved invagination types.**

- (a) Average intensity projection of 18 low, 21 medium, or 20 highly curved caveolae in MEFs.
- (b) The intensity plot illustrates normalized electron intensity, mean  $\pm$  SE from the center of the caveolae domain to its edge (gray value profile in a, caveolae number: n(low) = 63/4 cells, n(medium) = 81/4 cells, n(high) = 81/4 cells).
- (c-d) Delta grey value between minimal and maximal grey value in intensity plot profile (as illustrated in b) of caveolae domains in MEFs (c), HUVEC and HeLa (d). Intensity plot profiles were un-biased measured from the center of caveolae to their edges (averaging of 12 radial scans/caveolae, caveolae number: MEF: n(low) = 103; n(medium) = 116, n(high) = 63, \* P = 0.018, \*\*\*\* P = 3.1E-16, HUVEC: n(low) = 37; n(medium) = 80, n(high) = 71, \*\*\*\* P(medium) = 2.2E-7, P(high) = 3.5E-10, HeLa: n(low) = 63; n(medium) = 110, n(high) = 77, \*\*\*\* P(medium) = 1.18E-12, P(high) = 1.8E-15, 3 independent experiments, box plot indicates mean  $\pm$  SE, whiskers show SD, each replicate is depicted, statistical difference was measured by two-sided Mann Whitney test).
- (e) Average delta grey value per individual cell for low, medium or highly curved caveolae (n = 16 cells/9 independent experiments).
- (f) Individual caveolae delta grey values (n = 75 caveolae/3 cells) were plotted against their corresponding heights measured in electron tomograms. Linear correlation trend is depicted in red.

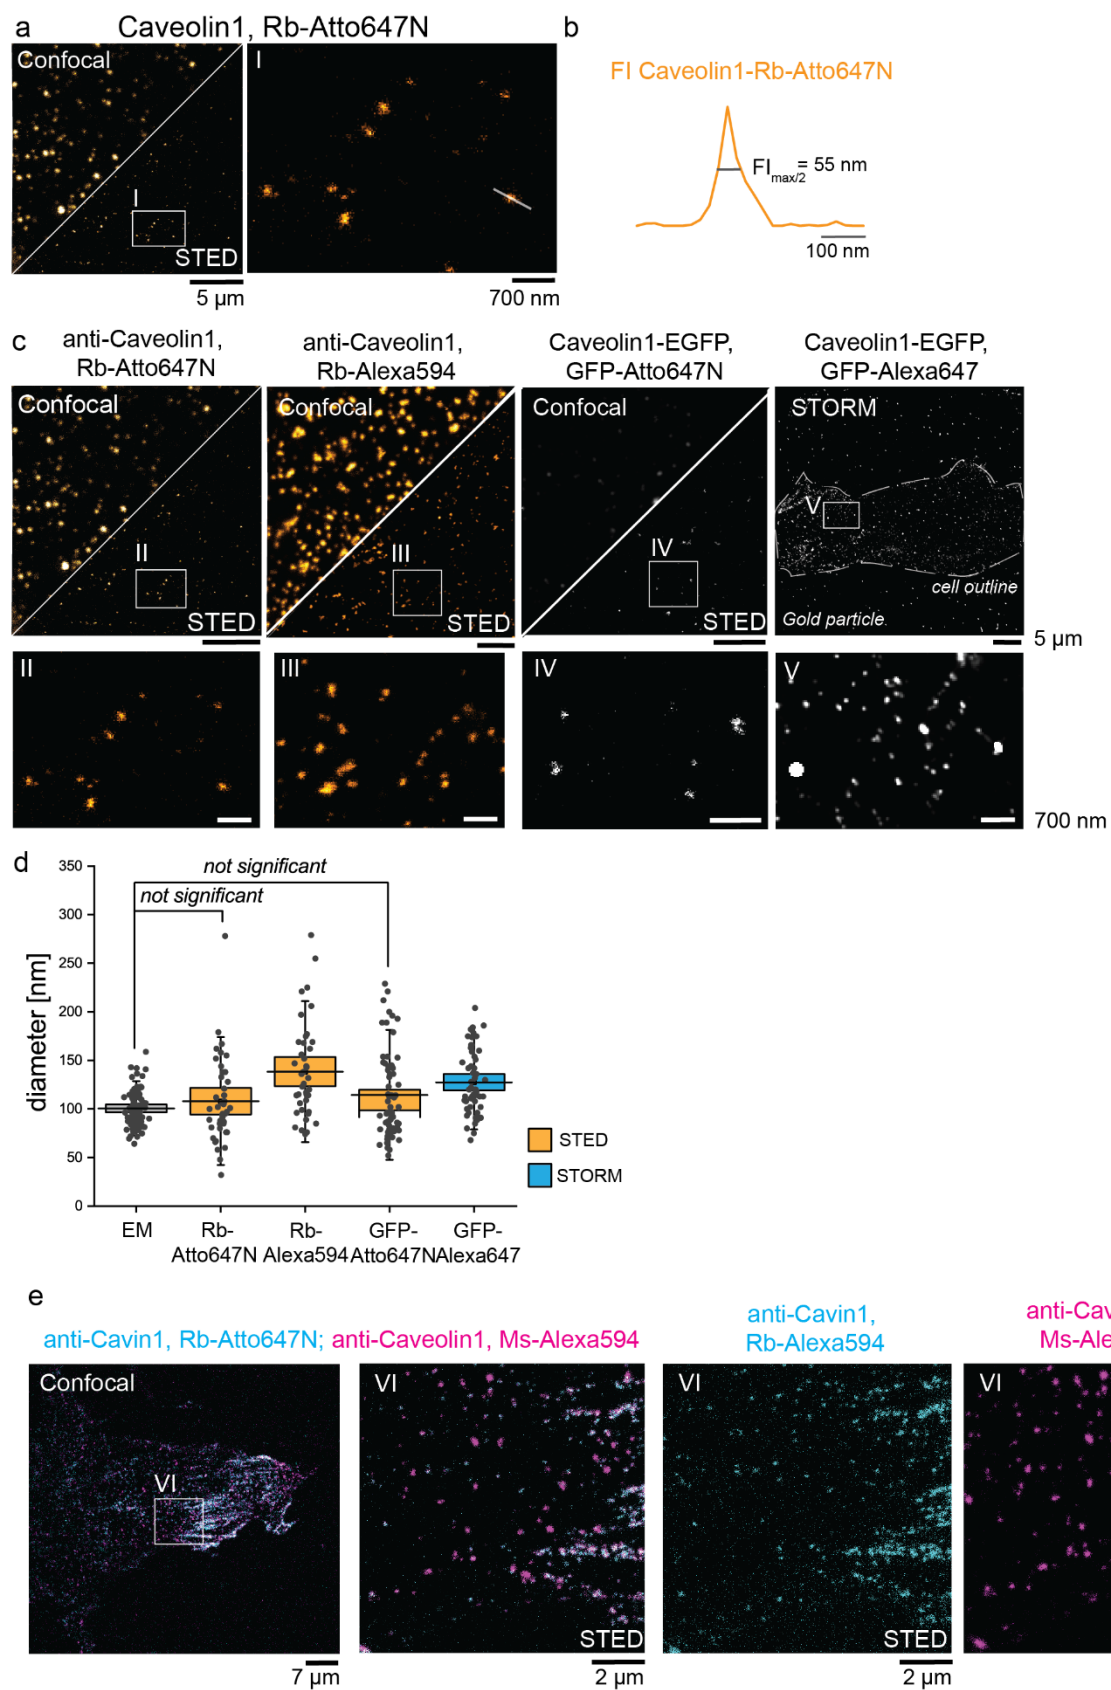

**Suppl. Figure 4: Exact caveolae size measurement by STED microscopy.**

- (a) Representative STED image of endogenous caveolin1 immunolabelled and tagged by Atto647N (Rabbit-Atto647N) in MEF plasma membrane sheets. Enlarged selection (a) illustrates single caveolin1 spots. White line indicates plot profile shown in (b, 3 independent experiments).
- (b) STED fluorescence plot profile (in orange) of a caveolin1 spot.  $FI_{\max/2}$  = half maximum of fluorescence intensity spot.
- (c) Representative caveolin1 fluorescence images obtained by STED and STORM (Stochastic Optical Reconstruction Microscopy). Lower panel illustrates zoom selection of the individual STED or STORM images.
- (d) Caveolin1 spot size measurement based on fluorescence plot profiles. STED (orange) and STORM (blue) data was compared to diameter measured in PREM images (Fig. 1B). Box plot indicates mean  $\pm$  SE, whiskers illustrate SD, each replicate is depicted ( $n(EM) = 82$  caveolae,  $n(STED-Rb-Atto647N) = 41$  spots,  $n(STED-Rb-Alexa594) = 42$  spots,  $n(STED-GFP\ nanobody-Atto647N) = 65$  spots,  $n(STORM-Alexa647) = 59$  spots, 2 independent experiments). Statistical difference was calculated by two-sided Mann Whitney test.
- (e) Representative confocal and STED image of endogenous cavin1 immunolabelled and tagged by Atto647N (Rabbit-Atto647N) in MEF plasma membrane sheets (cyan), caveolin1 was stained with antibody tagged with Alexa594 (mouse-Alexa594, magenta). Enlarged section represents STED image (VI, 2 independent experiments).

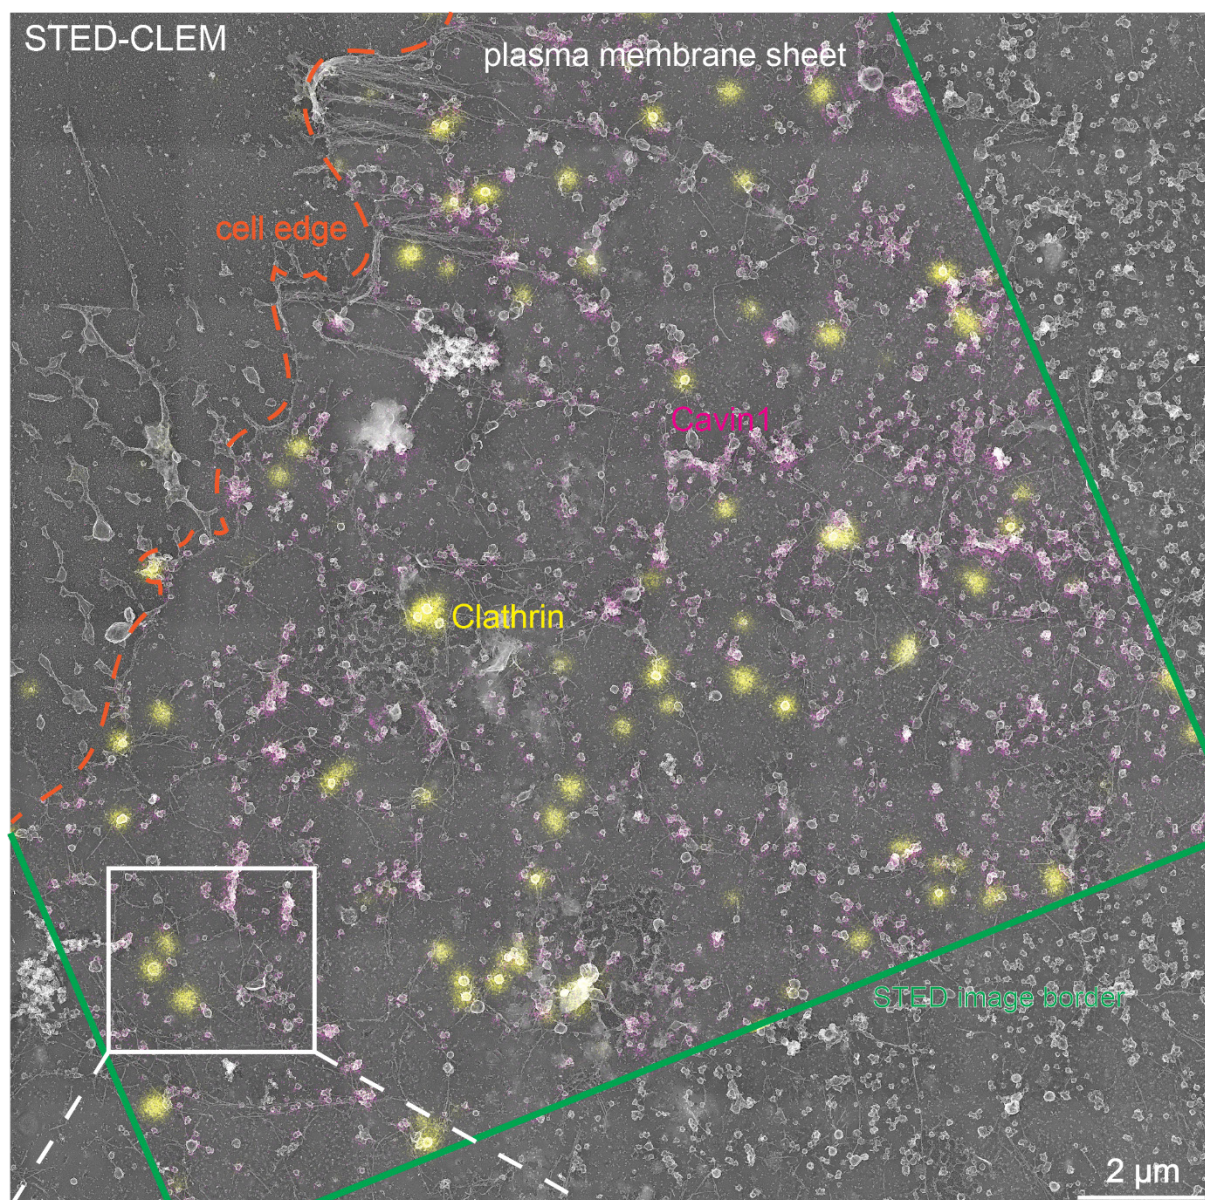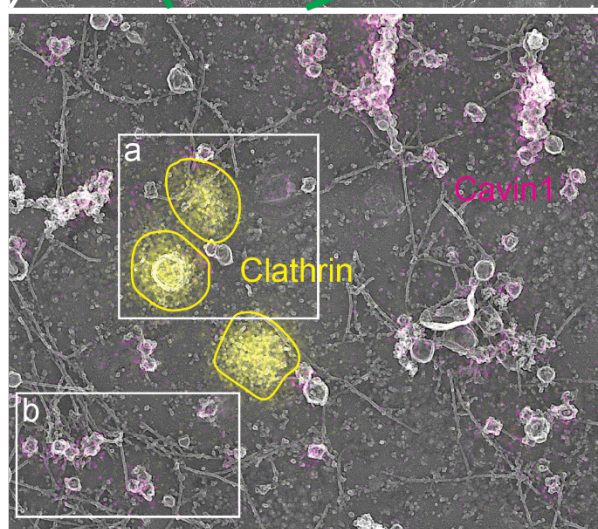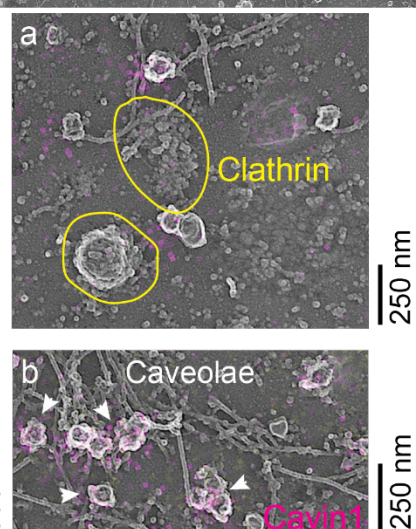

**Suppl. Figure 5: STED-CLEM overview of plasma membrane sheets showing clathrin and cavin1.**

Representative STED-CLEM image showing the acquired STED image that was correlated to the platinum replica TEM image. STED image border is shown in green, cell edge in orange. To achieve alignment of STED and PREM images, at first, cell edges were roughly aligned. Afterwards, detailed correlation was done by aligning clathrin fluorescence spots (in yellow) to the visible clathrin structures in the PREM image (done in Matlab, accordingly to<sup>46,85</sup>). Notably, due to the mass of the clathrin antibody, the characteristic geometric clathrin is partially obscured (see enlarged selection in a). Cavin1 fluorescence (in magenta) correlates to caveolae in PREM image (b, white arrows point to caveolae).

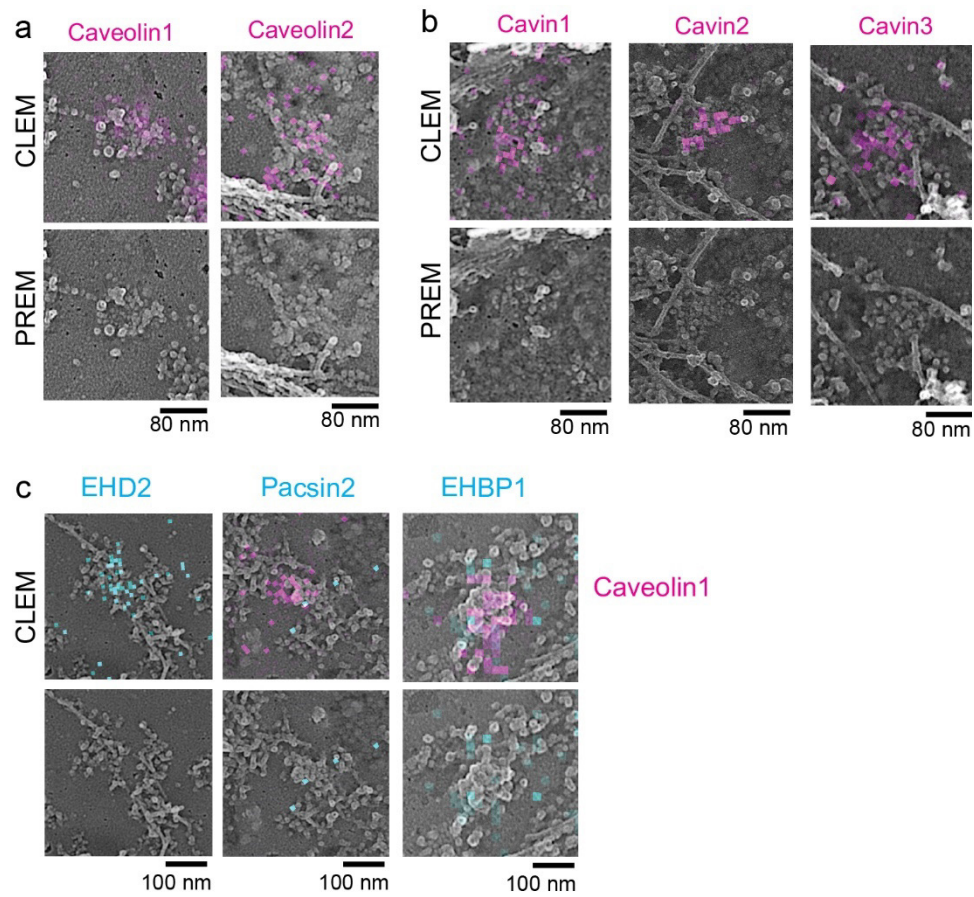

**Suppl. Figure 6: Immature caveolae sites can be detected by STED-CLEM.**

STED-CLEM of plasma membrane sheets of MEF expressing caveolin1 or 2 (a), cavin1-3 (b), or EHD2, pacsin2 or EHBP1 (c) revealed immature caveolae sites (3 independent experiments).

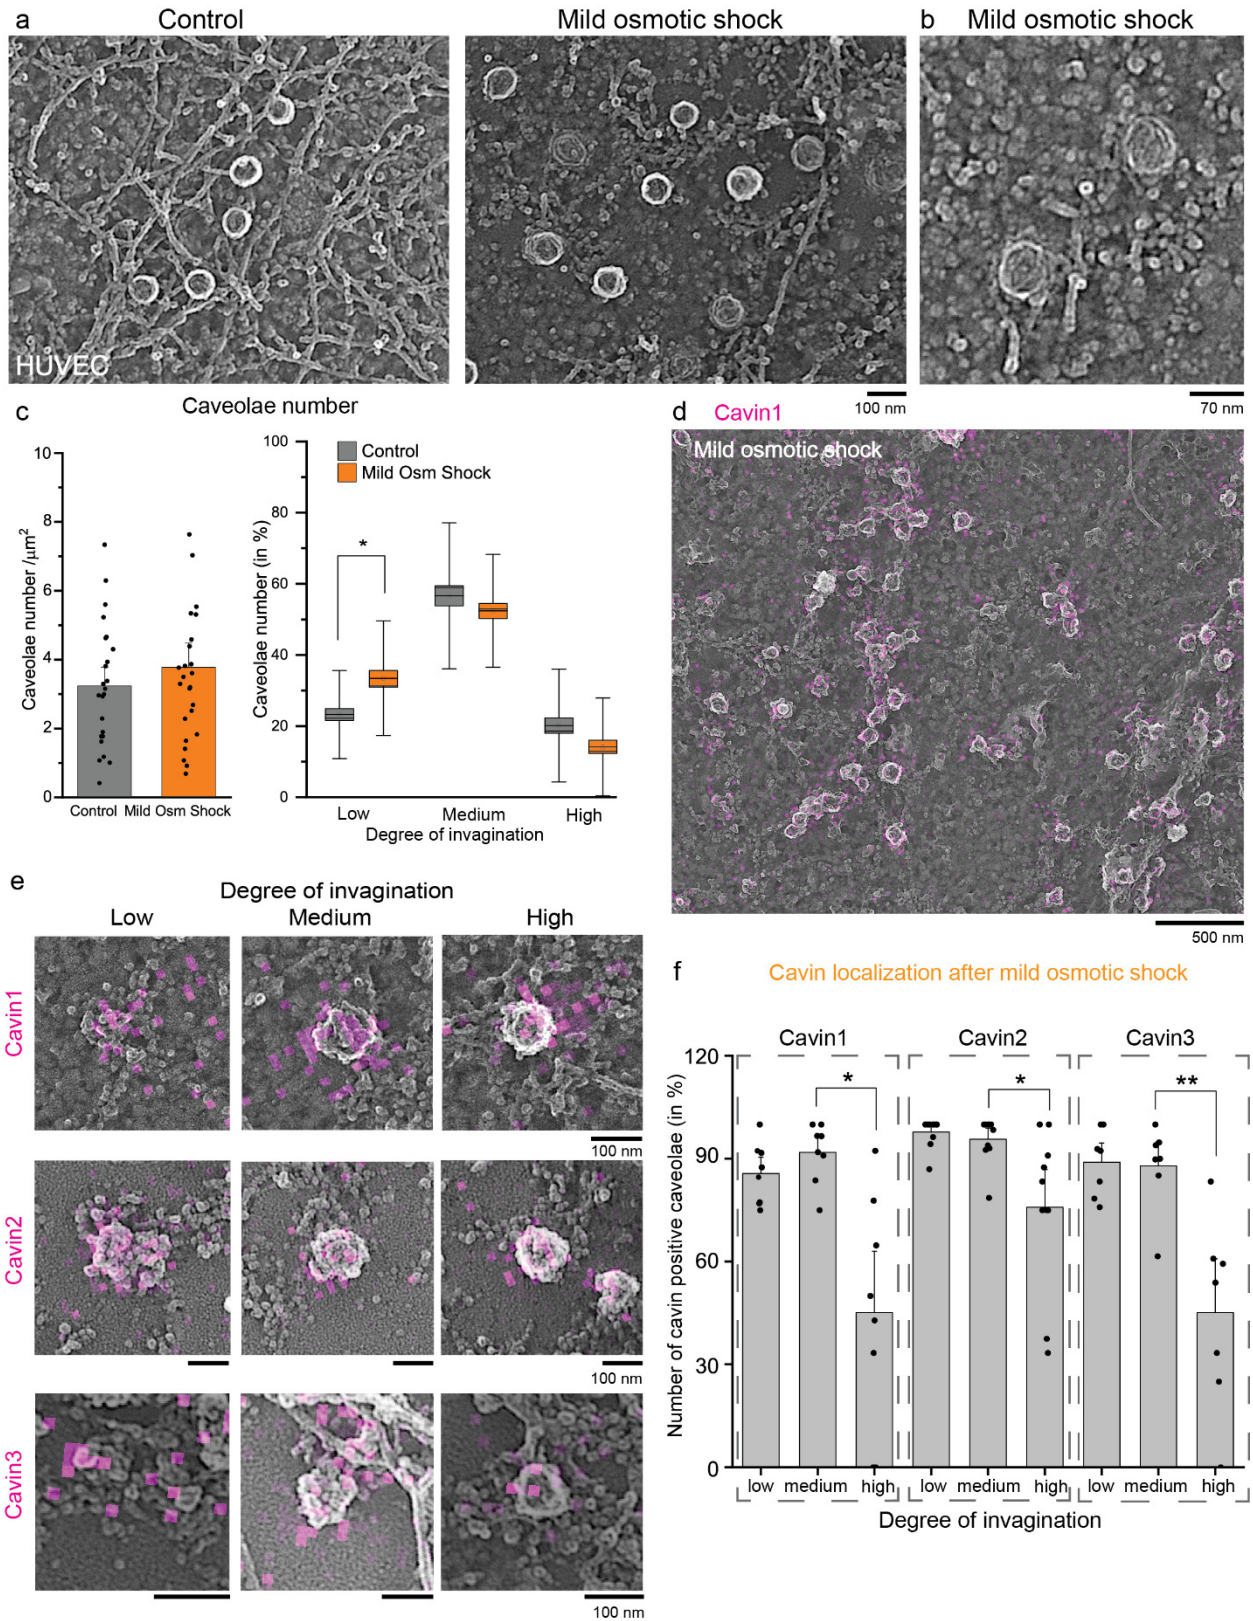

**Suppl. Figure 7: Cavin localization at low curved caveolae after mild osmotic shock in HUVEC.**

(a-b) Representative PREM images of caveolae in HUVEC plasma membrane sheets after mild osmotic shock (1:5 dilution with deionized water, 5 min).

(c) Caveolae number at the plasma membrane after mild osmotic shock (n(control) = 24 cell regions, n(mild osmotic) = 25 cell regions; Control: n(low) = 647 caveolae, n(medium) = 2053 caveolae, n(high) = 553 caveolae; Mild osmotic shock: n(low) = 581 caveolae, n(medium) = 1028 caveolae, n(high) = 246 caveolae, 3 independent experiments, \* P = 0.011).

(d) Representative STED-CLEM image of endogenous cavin1 (magenta) after mild osmotic shock.

(e) STED-CLEM of cavin1, 2 or 3 (magenta) in different caveolae types after mild osmotic shock.

(f) Percentage of cavin positive caveolae in STED-CLEM images after mild osmotic shock (Cavin1: n(low) = 192 caveolae, n(medium) = 316 caveolae, n(high) = 65 caveolae/8 cell regions, \* P = 0.0053; Cavin2: n(low) = 240 caveolae, n(medium) = 532 caveolae, n(high) = 89 caveolae/10 cell regions, \* P = 0.0148; Cavin3: n(low) = 149 caveolae, n(medium) = 180 caveolae, n(high) = 92 caveolae/7 cell regions, \*\* P = 0.00329; 3 independent experiments).

Box or bar plots illustrate mean values  $\pm$  SE, whiskers show SD, each replicate is depicted, two-sided Mann Whitney test for statistical difference.

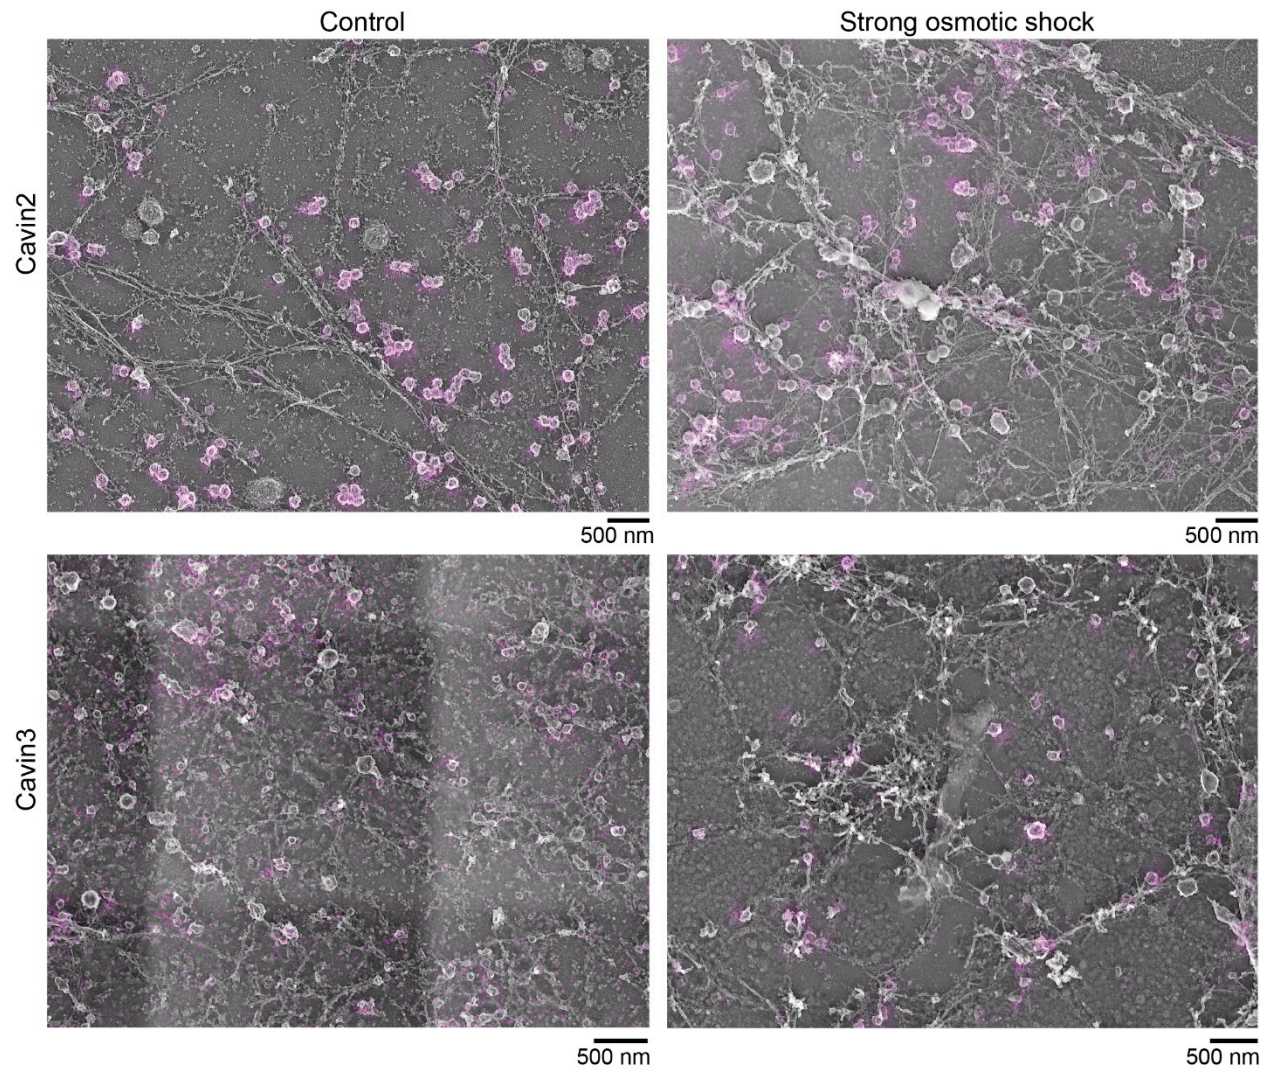

**Suppl. Figure 8: Representative overview STED-CLEM images of endogenously stained cavin2 or 3 in HUVEC plasma membrane sheets treated with strong osmotic shock (1:9 dilution with deionized water, 3 independent experiments).**

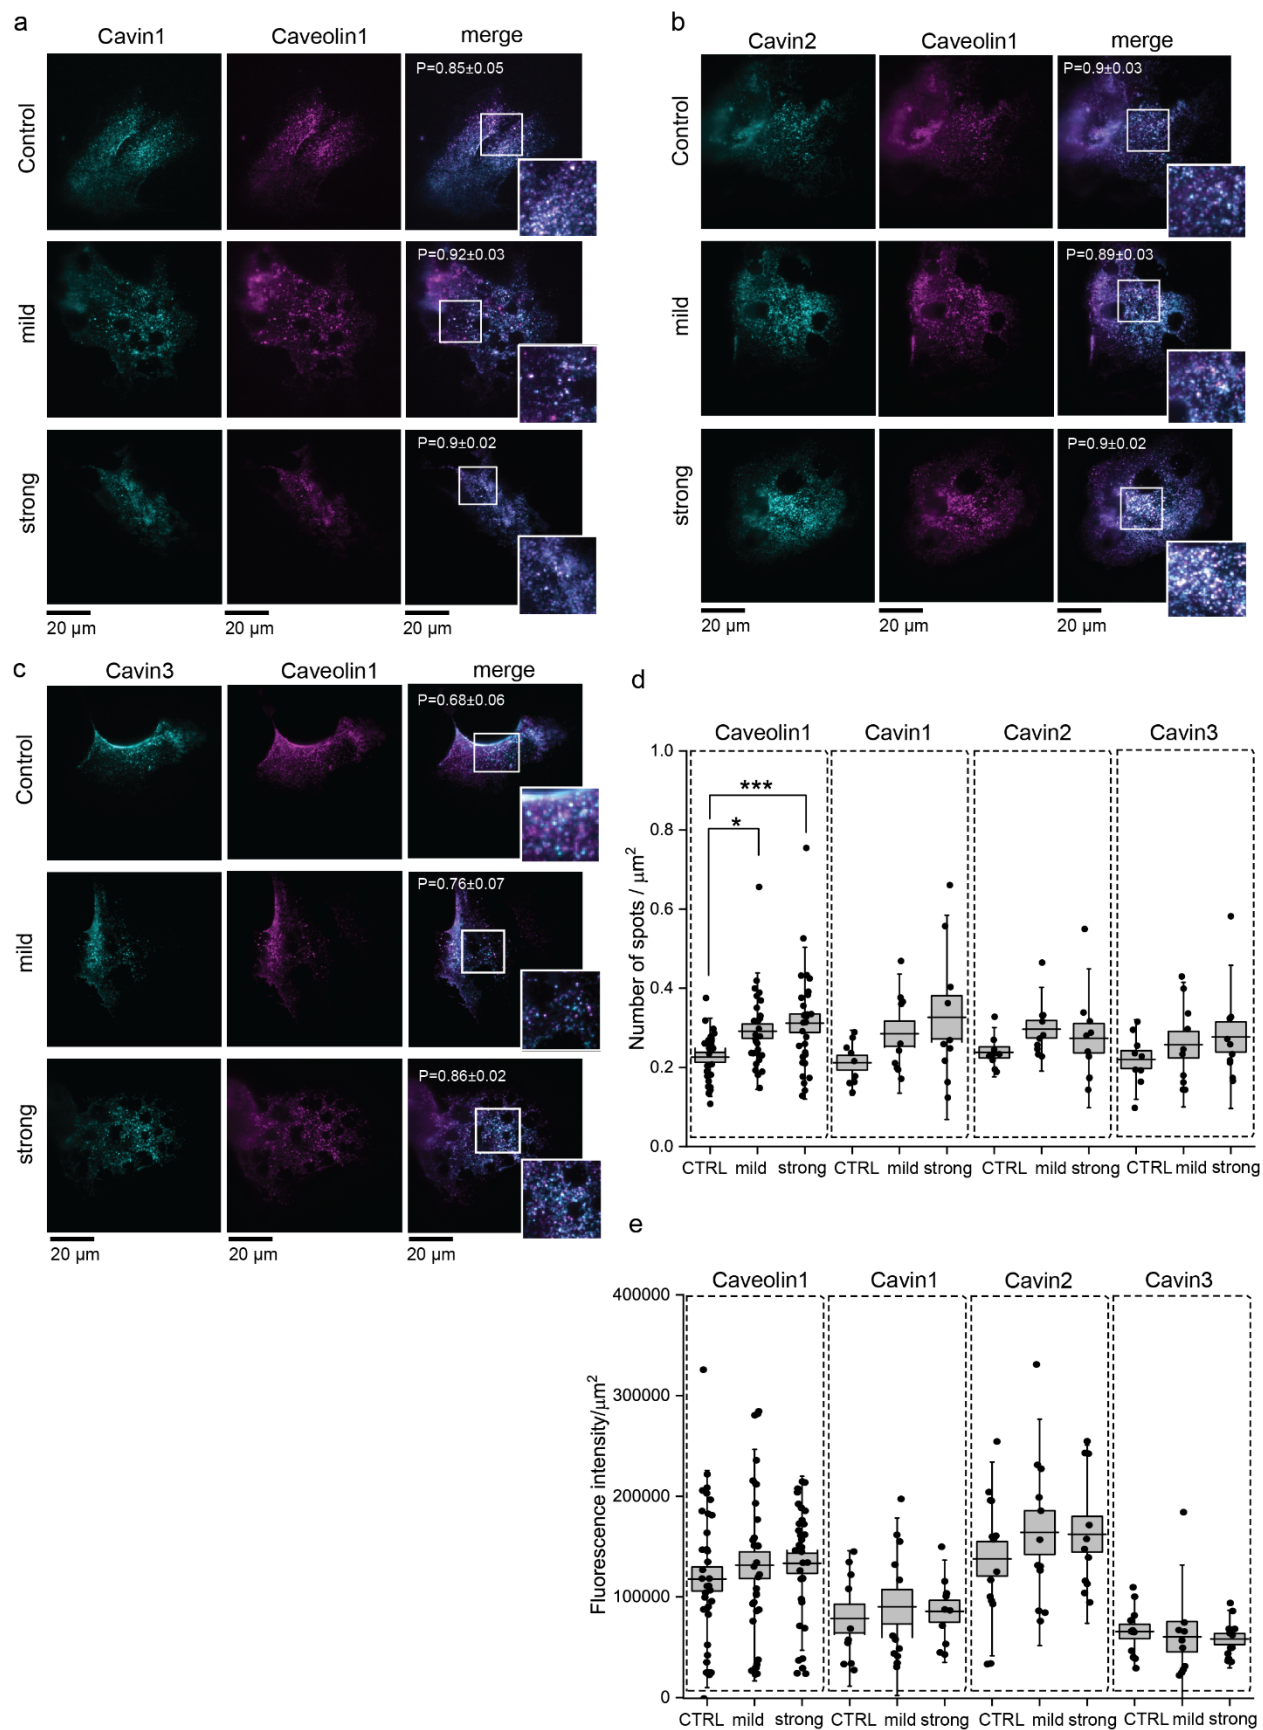

**Suppl. Figure 9: Cavin1, 2 and 3 localization to Caveolin1 in intact HUVEC after osmotic shock.**

(a-c) Representative TIRF images of intact HUVEC treated either with mild (1:5 dilution with deionized water) or strong (1:9 dilution with deionized water) osmotic shock for 5 min followed by immunostaining of cavin1 (a), cavin2 (b), or cavin3 (c). Cavin - caveolin1 colocalization was evaluated by Pearson correlation (P).

(d) Number of caveolin1 and cavin1-3 spots in TIRF imaging zone of the cell. (Caveolin1: n(CTRL) = 27 cells, n(mild) = 30 cells, n(strong) = 30 cells; cavin1: n(CTRL) = 9 cells, n(mild) = 10 cells, n(strong) = 10 cells; cavin2: n(CTRL) = 9 cells, n(mild) = 10 cells, n(strong) = 10 cells; cavin3: n(CTRL) = 9 cells, n(mild) = 10 cells, n(strong) = 10 cells; 2 independent experiments, \* P = 0.00552, \*\*\* P = 6.9E-4).

(e) Fluorescence intensity per membrane area of endogenously caveolin1 or cavin1-3 staining after mild or strong osmotic shock (Caveolin1: n(CTRL) = 36 cells, n(mild) = 34 cells, n(strong) = 33 cells; cavin1: n(CTRL) = 10 cells, n(mild) = 12 cells, n(strong) = 11 cells; cavin2: n(CTRL) = 14 cells, n(mild) = 12 cells, n(strong) = 11 cells; cavin3: n(CTRL) = 12 cells, n(mild) = 10 cells, n(strong) = 12 cells; 2 independent experiments).

Box plots illustrate mean values  $\pm$  SE, whiskers show SD, each replicate is depicted, two-sided Mann Whitney test for statistical difference.

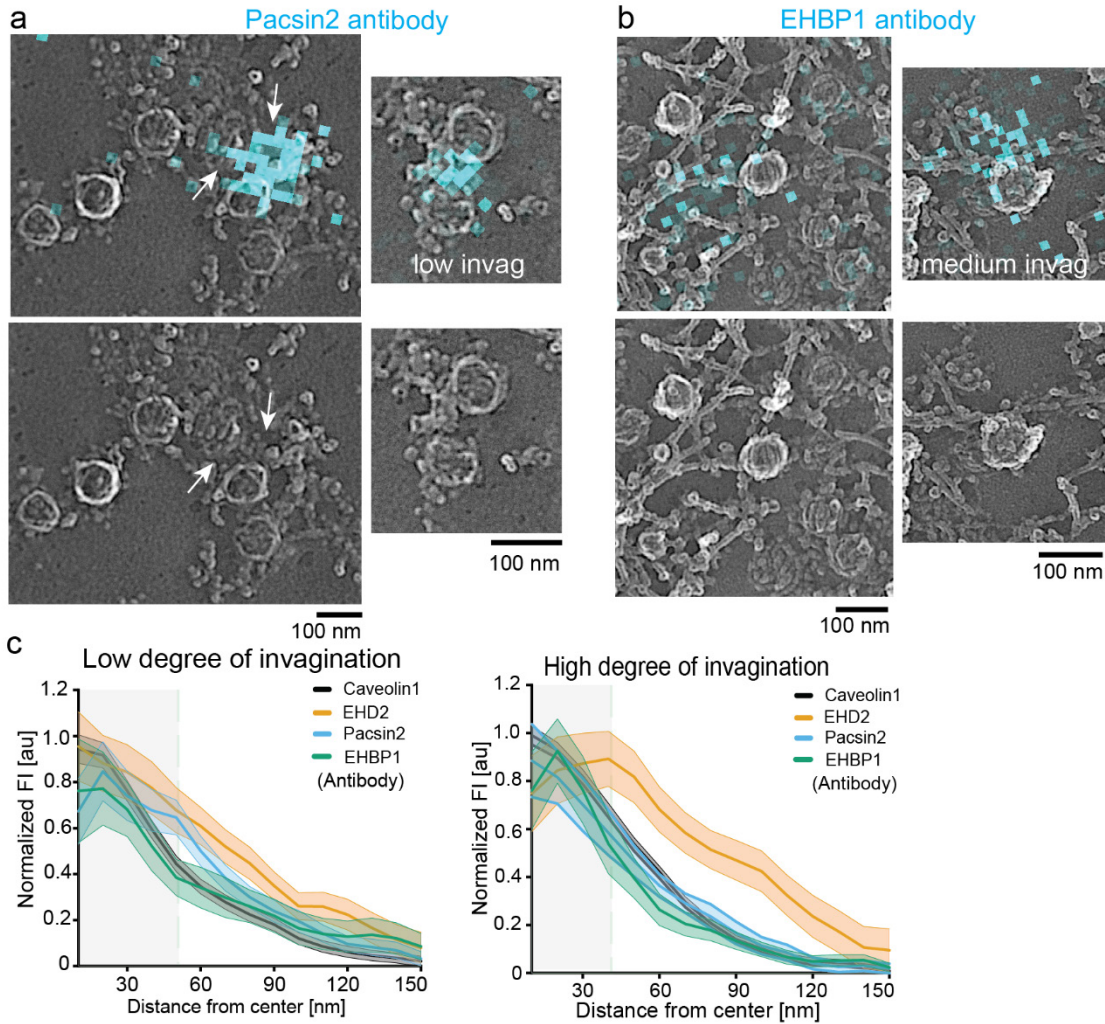

**Suppl. Figure 10: Endogenous staining of Pacsin2 and EHBP1 at caveolae.**

(a-b) Representative CLEM images for MEFs stained with antibodies against pacsin2 (A) or EHBP1 (B). The secondary antibody was labelled with Atto647N. White arrows in (A) indicate pacsin2 localization at low curved caveolae. Scale bar shows 80 nm.

(c) Quantitative analysis of low or highly curved caveolae by STED fluorescence profiles obtained from endogenous antibody staining. Line graphs show mean  $\pm$  SE from the center of caveolae to their edges (indicated by green dashed line, caveolae number: caveolin1: n(low) = 145, n(high) = 178; EHD2: n(low) = 165, n(high) = 161; pacsin2: n(low) = 77, n(high) = 49; EHBP1: n(low) = 60, n(high) = 37, 2 independent experiments).

a

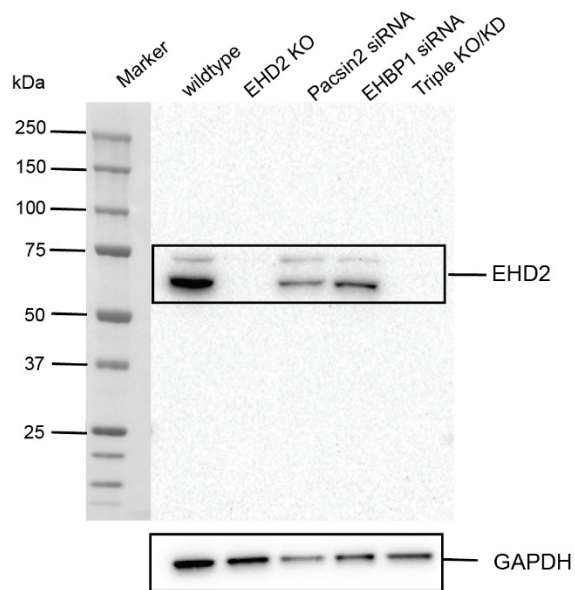

b

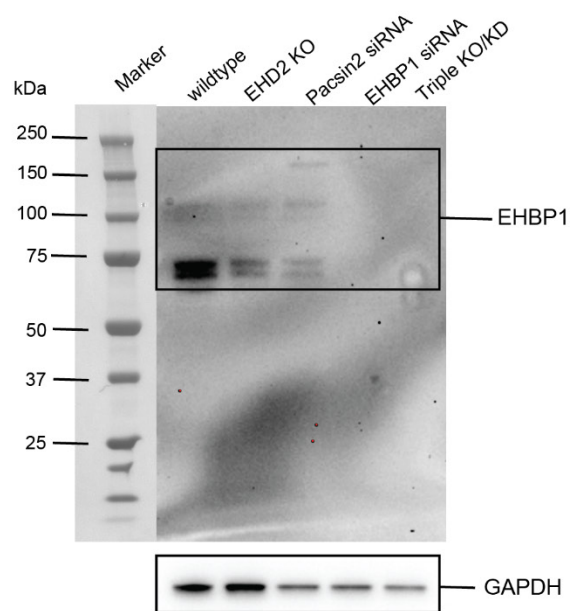

c

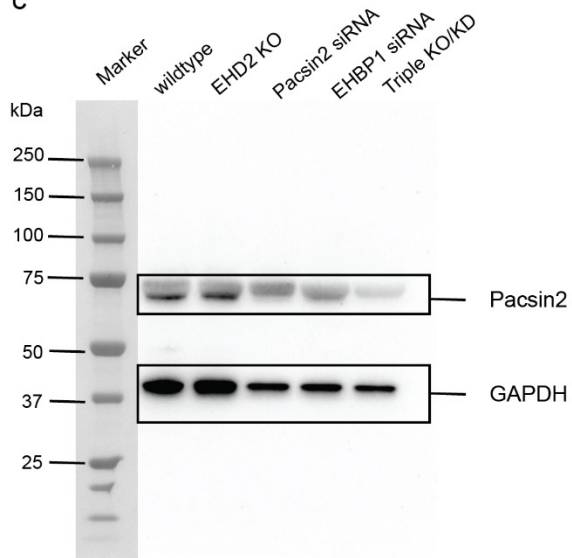

d

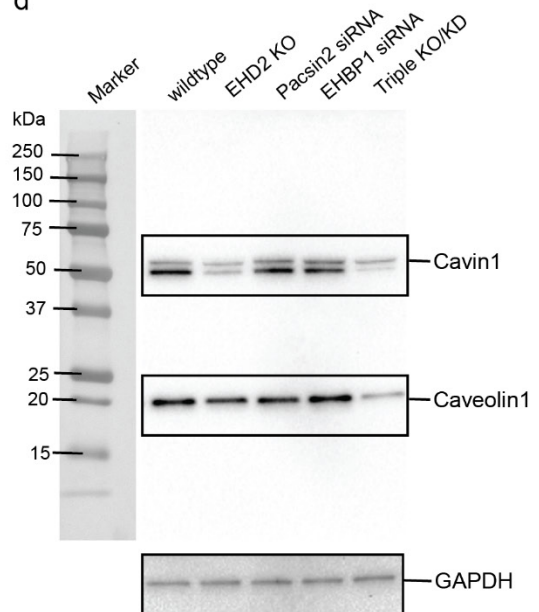

**Suppl. Figure 11: Western Blot validation of pacsin2 and EHBP1 knockdown.**

(a-c) Western Blot validation of MEFs treated with pacsin2 or EHBP1 siRNA or EHD2 knockout (KO) MEFs showing protein levels of EHD2 (a), EHBP1 (b) or pacsin2 (c). EHBP1 antibody band size ~ 160-180 kDa, pacsin2 antibody band size ~ 60-65 kDa, GAPDH band size ~37 kDa (3 independent experiments).

(d) Western Blot analysis of cavin1 and caveolin1 protein levels in MEFs lacking EHD2, pacsin2 or EHBP1. Cavin1 antibody predicted band size ~ 51 kDa, caveolin1 band size ~ 20 kDa (3 independent experiments).

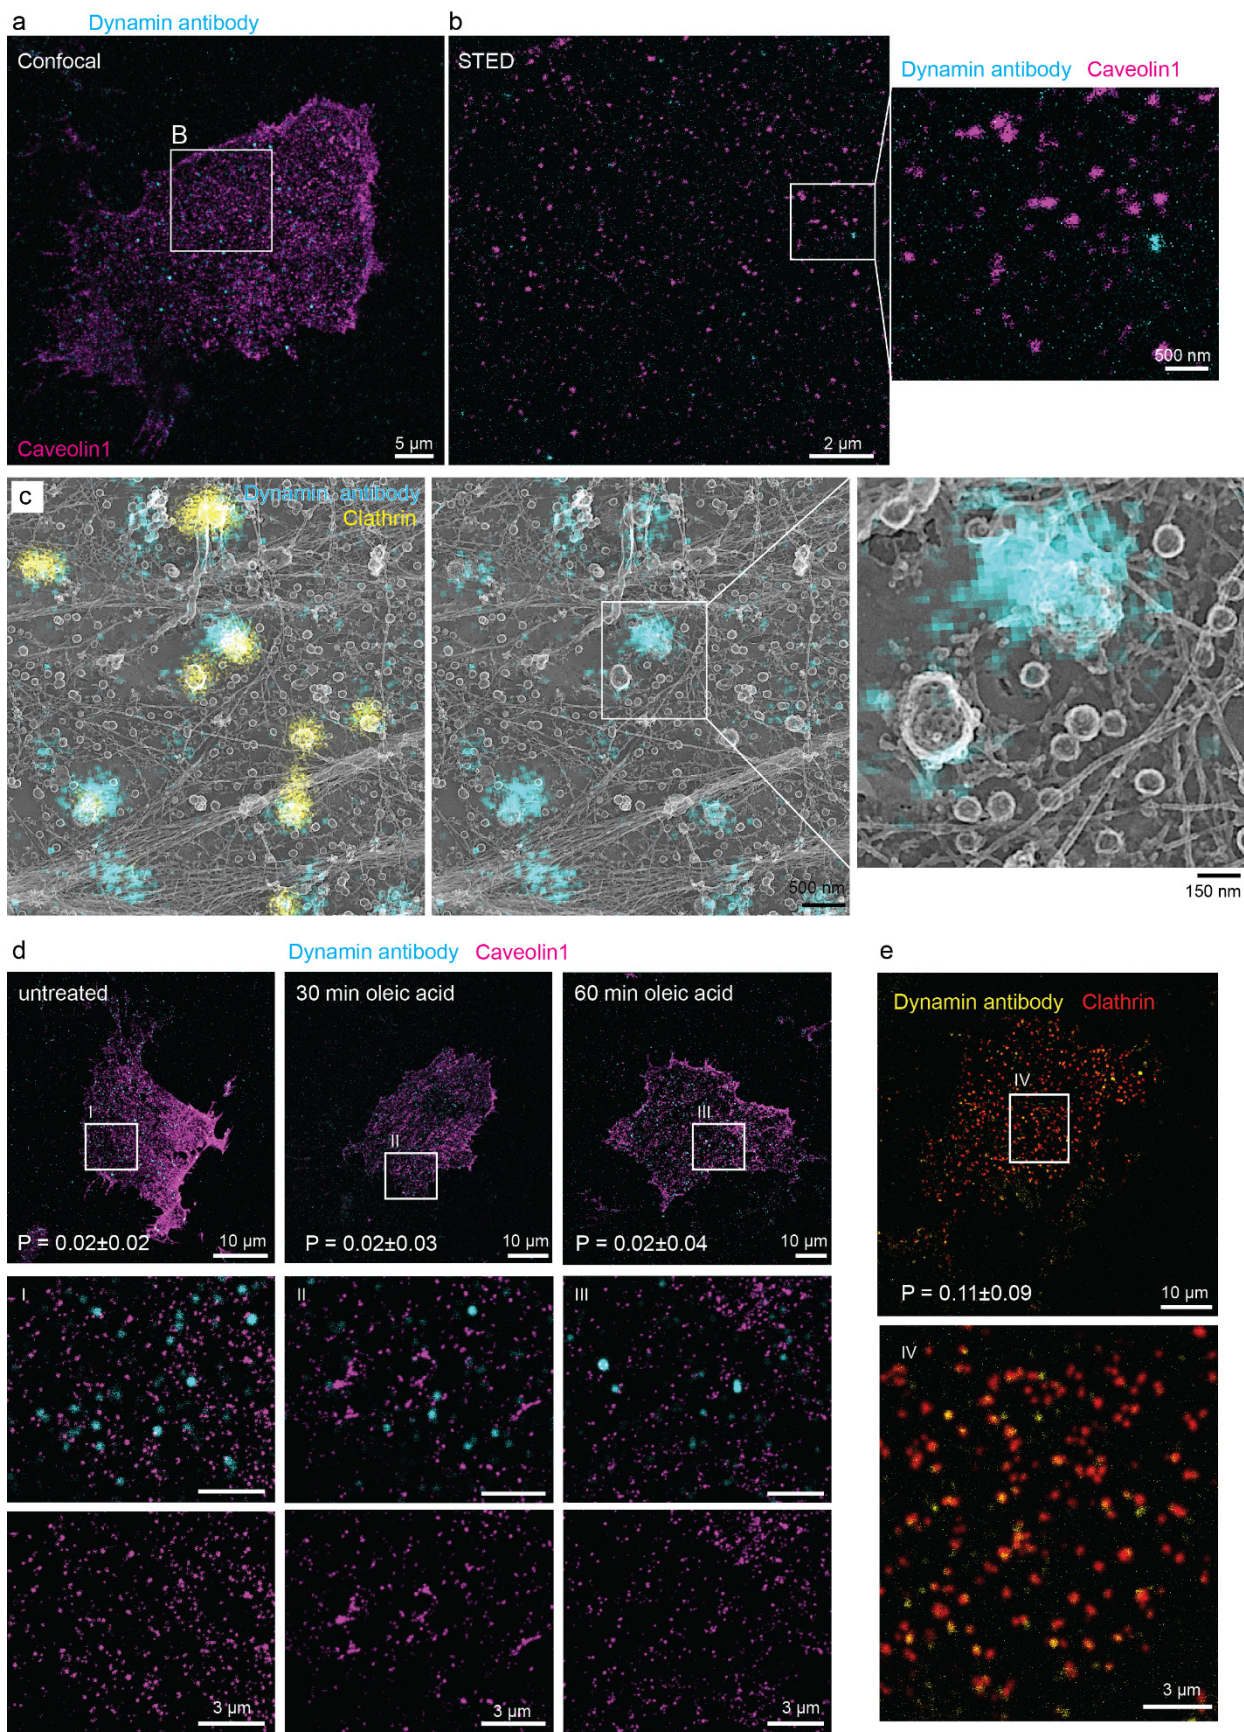

**Suppl. Figure 12: Immunostaining of endogenous dynamin in MEFs did not show localization to caveolae.**

- (a) Confocal overview of MEF plasma membrane sheet stained against caveolin1 (magenta) and dynamin (cyan). Indicated selection was used for STED microscopy in B (2 independent experiments).
- (b) Representative STED image of caveolin1 (magenta) and dynamin (cyan) labelled with antibodies.
- (c) STED-PREM image showing antibody labelled dynamin (cyan) and clathrin (yellow, 2 independent experiments). Enlarged panel illustrates caveolae and specific dynamin localization to clathrin coat.
- (d) Representative STED images of caveolin1 (magenta) and dynamin (cyan) labelled with antibodies in MEFs treated oleic acid for either 30 or 60 min. Pearson correlation (P) indicates caveolin1 – dynamin colocalization (n(untreated) = 9 cells, n(30 min) = 11 cells, n(60 min) = 9 cells, 2 independent experiments).
- (e) Representative STED image of clathrin (red) and dynamin (yellow) labelled with antibodies illustrates colocalization (n = 12 cells).

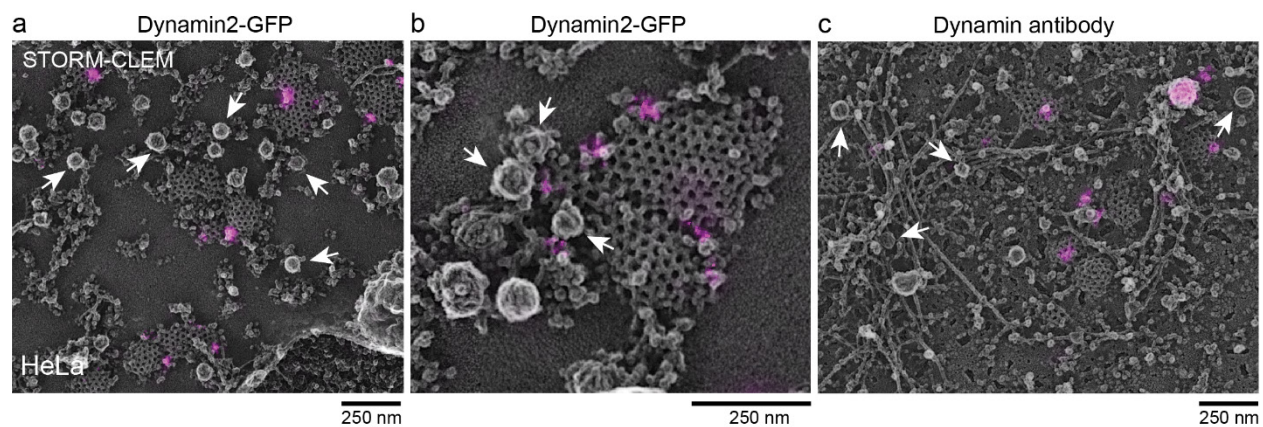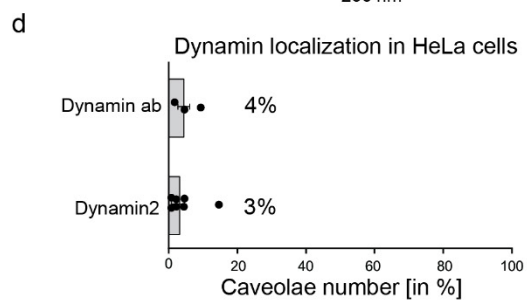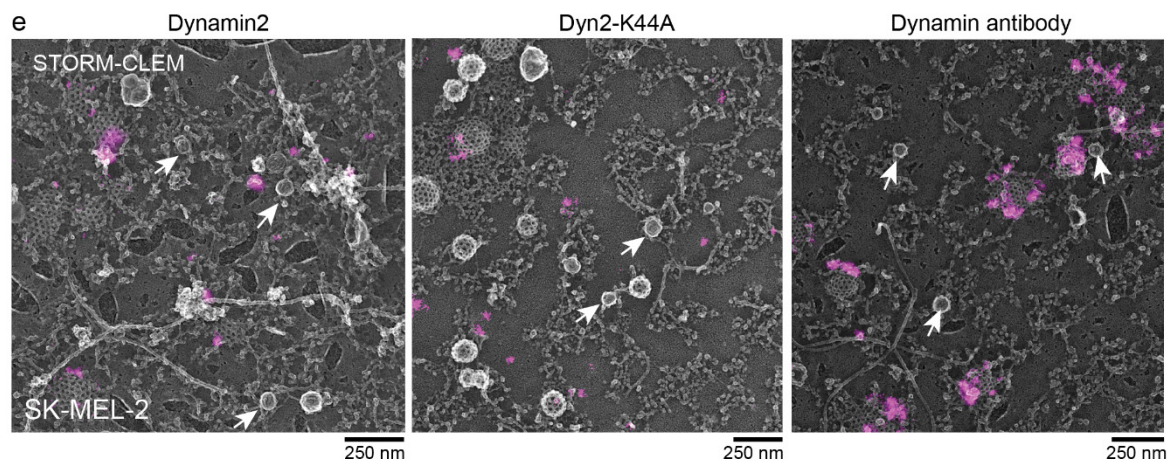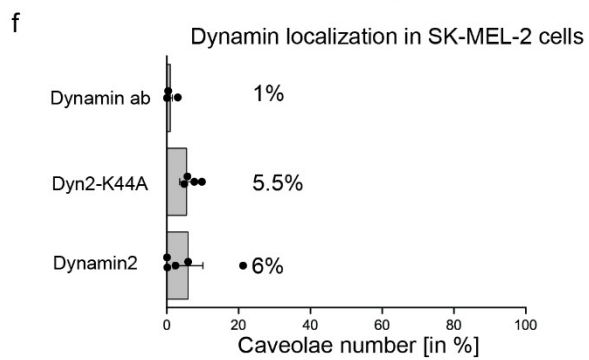

**Suppl. Figure 13: STORM-CLEM in HeLa and SK-MEL-2 cells did not show dynamin localization to caveolae.**

(a-b) Representative STORM-CLEM images illustrating STORM signal (in magenta) of dynamin2-GFP in Pt replicas of HeLa plasma membrane sheets. (B) illustrates dynamin localization to clathrin coat in close proximity to caveolae. White arrows indicate caveolae.

(c) Representative STORM-CLEM images illustrating STORM signal (in magenta) of endogenous dynamin antibody labelling in Pt replicas of HeLa plasma membrane sheets. White arrows indicate caveolae.

(d) Percentage of caveolae that were targeted by either dynamin2 or dynamin antibody in HeLa. 75.3% of dynamin stained caveolae are close to clathrin (less than 50 nm distance). Bar graph shows mean  $\pm$  SE (n(Dynamin antibody) = 428 caveolae/3 cells, n(Dynamin2) = 1649 caveolae/7 cells; 3 independent experiments).

(e) Representative STORM-CLEM images illustrating STORM signal (in magenta) in SK-MEL-2 cells expressing either dynamin2-GFP or Dyn2-K44A-GFP, or were immune-stained to label endogenous dynamin. White arrows indicate caveolae.

(f) Percentage of caveolae that were targeted by either dynamin2, dynamin2-K44A or dynamin antibody in SK-MEL-2 cells. Notably, 23.75% of dynK44A positive caveolae are close to clathrin (less than 50 nm distance). Bar graph shows mean  $\pm$  SE (n(Dynamin antibody) = 428 caveolae/4 cells, n(Dyn2-K44A) = 270 caveolae/4 cells, n(Dynamin2) = 426 caveolae/5 cells; 3 independent experiments).

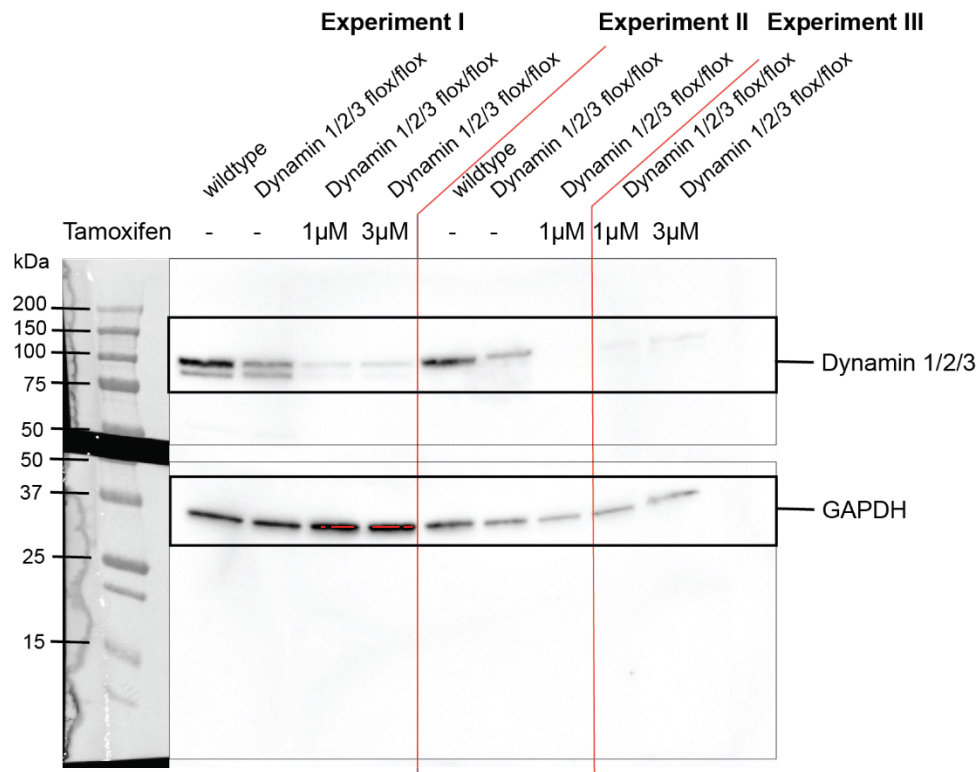

**Suppl. Figure 14: Western Blot validation of dynamin triple knockout.**

Western Blot illustrates three independent dynamin knockout experiments. Dynamin antibody recognizes all three isoforms, band size ~ 100 kDa, GAPDH band size 37 kDa (3 independent experiments).
